# Supplementary material
Source: PubMed Central journal article supplement (PMC4372733)
Supplement: JB.02420-14_zjb999093557so1.pdf [file JB.02420-14_zjb999093557so1.pdf]

1 **Supplementary Information**

2 **Table S1** Primers used for gene amplification. Restriction sites are underlined.

| Gene                    | Direction | Sequence                             |
|-------------------------|-----------|--------------------------------------|
| <i>casI</i> (ro05822)   | Forward   | CCGGCATATGGAGTTGGAACGCACCACGATCG     |
|                         | Reverse   | GCGCAAGCTTCACACGTGCAGGAATCGTTGCCG    |
| <i>casG</i> (ro05820)   | Forward   | CGCCATATGACTGCCCTACAGATCCAC          |
|                         | Reverse   | GGCCAAGCTTCAGACGGTGATGTCCCGGCGG      |
| <i>fadE34</i> (rv3573c) | Forward   | GGGCCATATGGTAGCGACCGTCACCGACGAAC     |
|                         | Reverse   | CGGCAAGCTTCAACGCGGCAGACCCAGCAGC      |
| <i>casC</i> (ro05816)   | Forward   | GGCGCATATGACAATGGGATTGACCGAAGAAGAGCG |
|                         | Reverse   | CCGCAAGCTTCACGCTCCCTTTCCGGGCTCGGG    |

3

4 **Table S2** Primers used for site-directed mutagenesis. Substituted codons/bases are bolded.

| Mutation          | Direction | Sequence 5' to 3'                            |
|-------------------|-----------|----------------------------------------------|
| FadE29E241Q       | Forward   | CTCAACAACCAACGGGTAATGCTCGGCCCGGCCGGGC        |
|                   | Reverse   | ATTACCCGTTGGTTGTTGAGTTGGGTGGTGATCAGCCGCC     |
| FadE28R227A       | Forward   | GGCGAACCGCGAAGCAGTTCGGTAAGCCGCTGTCAACCTTCCAG |
|                   | Reverse   | GAAGTCTTCGCGTTCGCCACGTAGTCGGCGGTCAGCCGC      |
| FadE34E581Q       | Forward   | CCAACCAGCGGGTCGCGATGGCCACC                   |
|                   | Reverse   | GACCCGCTGGTTGGCTAACGTGGTGCGCGC               |
| FadE34R236A       | Forward   | CCAAGGTGGCAGAGCAATTCGGCAAGCCG                |
|                   | Reverse   | CGAATTGCTCTGCAACCTTGGCGTAGGCAACCG            |
| CasCE598Q         | Forward   | GCCAACAACGGGTGTCGCTGTCGCACG                  |
|                   | Reverse   | CCGTTGGTTGGCGAGGGTCGTGCGGG                   |
| CasCR239A         | Forward   | CAACGTAGCTCATCAGTTCGGCCGCCCATC               |
|                   | Reverse   | CTGATGAGCTACGTTGGCGTAGTCGGCGGCG              |
| <i>casC</i> sacI5 | Forward   | CTCCTGGTGGGCGAACCGGGCGACGGCTGGGAGCTCGC       |
| <i>casC</i> sacI3 | Reverse   | CGTTGGCGAGGGTCGTGCGGGCGAGCTCCCAGCCGTC        |

5

**Table S3** Sequence similarities/identities among classical and steroid degrading ACADs.

Percent similarities and identities between pairs of sequences are indicated at the top and bottom of each cell, respectively. The following ACADs are compared : short chain acyl-CoA dehydrogenase from *Megasphaera elsdenii* (SCAD\_Melsdenii), pig medium chain acyl-CoA dehydrogenase (MCAD\_Pig), human isovaleryl-CoA dehydrogenase (IVD\_human), rat long chain acyl-CoA dehydrogenase (rat\_LCAD), human isobutyryl-CoA dehydrogenase (IBH\_human), FadE26 (FadE26\_Mtb), FadE27 (FadE27\_Mtb), FadE28 (FadE28\_Mtb), FadE29 (FadE29\_Mtb), N-terminal ACAD domain of FadE34 (FadE34Nterm\_Mtb), C-terminal ACAD domain of FadE34 (FadE34Cterm\_Mtb) from *M. tuberculosis* H37Rv, N-terminal ACAD domain of CasC (CasCNterm\_Mtb) and C-terminal ACAD domain of CasC (CasCterm\_Mtb) from *R. jostii* RHA1.

|                   | FadE26_Mtb | FadE27_Mtb | FadE28_Mtb | FadE29_Mtb | CasCNterm_Rjostii | CasCCterm_Rjostii | FadE34Nterm_Mtb | FadE34Cterm_Mtb |
|-------------------|------------|------------|------------|------------|-------------------|-------------------|-----------------|-----------------|
| FadE26_Mtb        | -          | 31%<br>14% | 26%<br>13% | 62%<br>45% | 26%<br>13%        | 40%<br>24%        | 27%<br>15%      | 39%<br>25%      |
| FadE27_Mtb        | -          | -          | 41%<br>25% | 26%<br>12% | 32%<br>22%        | 22%<br>12%        | 29%<br>19%      | 24%<br>13%      |
| FadE28_Mtb        | -          | -          | -          | 26%<br>14% | 31%<br>19%        | 24%<br>13%        | 29%<br>17%      | 24%<br>12%      |
| FadE29_Mtb        | -          | -          | -          | -          | 25%<br>14%        | 41%<br>25%        | 27%<br>16%      | 41%<br>26%      |
| CasCNterm_Rjostii | -          | -          | -          | -          | -                 | 20%<br>10%        | 52%<br>40%      | 19%<br>10%      |
| CasCCterm_Rjostii | -          | -          | -          | -          | -                 | -                 | 23%<br>10%      | 69%<br>49%      |
| FadE34Nterm_Mtb   | -          | -          | -          | -          | -                 | -                 | -               | 22%<br>12%      |
| IVH_Human         | 43%<br>20% | 37%<br>22% | 29%<br>16% | 41%<br>22% | 33%<br>19%        | 32%<br>17%        | 30%<br>16%      | 33%<br>16%      |
| LCAD_rat          | 36%<br>20% | 30%<br>14% | 28%<br>14% | 36%<br>19% | 28%<br>13%        | 29%<br>15%        | 26%<br>11%      | 29%<br>17%      |
| IBH_human         | 38%<br>20% | 31%<br>14% | 30%<br>14% | 39%<br>23% | 31%<br>16%        | 32%<br>19%        | 30%<br>15%      | 34%<br>19%      |
| SCAD_Melsdenii    | 38%<br>20% | 36%<br>21% | 32%<br>21% | 38%<br>21% | 33%<br>18%        | 35%<br>18%        | 32%<br>17%      | 33%<br>17%      |
| MCAD_Pig          | 39%<br>21% | 33%<br>16% | 30%<br>16% | 37%<br>20% | 32%<br>17%        | 34%<br>19%        | 29%<br>18%      | 35%<br>20%      |

15 **Figure S1** Multiple sequence alignment of acyl-CoA dehydrogenases.

16 Amino acid sequences of proteins are as follows: short chain acyl-CoA dehydrogenase from *Megasphaera*

17 *elsdenii* (SCAD\_Melsdenii), pig medium chain acyl-CoA dehydrogenase (MCAD\_Pig), human isovaleryl-CoA

18 dehydrogenase (IVD\_human), rat long chain acyl-CoA dehydrogenase (rat\_LCAD), human isobutyryl-CoA

19 dehydrogenase (IBH\_human), FadE26 (FadE26\_Mtb), FadE27 (FadE27\_Mtb), FadE28 (FadE28\_Mtb), FadE29

20 (FadE29\_Mtb), N-terminal ACAD domain of FadE34 (FadE34Nterm\_Mtb), C-terminal ACAD domain of

21 FadE34 (FadE34Cterm\_Mtb) from *M. tuberculosis* H37Rv, N-terminal ACAD domain of CasC

22 (CasCNterm\_Mtb) and C-terminal ACAD domain of CasC (CasCterm\_Mtb) from *R. jostii* RHA1. Fully

23 conserved residues are highlighted in red while functional residues within classical ACADs that are conserved

24 in steroid degrading ACADs are highlighted as follows: residues highlighted in green are the catalytic glutamic

25 acid residues and residues highlighted in purple are the arginine residues that interact with the pyrophosphate

26 FAD. Residues that form side chain interactions with isoalloxazine and adenosine ribose of FAD are

27 highlighted in yellow and the arginine residues that interact with CoA of substrate are highlighted in cyan.

```

MCAD_Pig
SCAD_Melsdenii
IBH_human
LCAD_rat
IVH_Human
FadE26_Mtb
FadE27_Mtb
FadE28_Mtb
FadE29_Mtb
CasCterm_Rjostii
CasCterm_Rjostii
FadE34Nterm_Mtb
FadE34Cterm_Mtb

```

1 10 20

```

MCAD_Pig
SCAD_Melsdenii
IBH_human
LCAD_rat
IVH_Human
FadE26_Mtb
FadE27_Mtb
FadE28_Mtb
FadE29_Mtb
CasCterm_Rjostii
CasCterm_Rjostii
FadE34Nterm_Mtb
FadE34Cterm_Mtb

```

30 40 50 60 70

```

MCAD_Pig
SCAD_Melsdenii
IBH_human
LCAD_rat
IVH_Human
FadE26_Mtb
FadE27_Mtb
FadE28_Mtb
FadE29_Mtb
CasCterm_Rjostii
CasCterm_Rjostii
FadE34Nterm_Mtb
FadE34Cterm_Mtb

```

80 90 100 110 120

```

MCAD_Pig
SCAD_Melsdenii
IBH_human
LCAD_rat
IVH_Human
FadE26_Mtb
FadE27_Mtb
FadE28_Mtb
FadE29_Mtb
CasCterm_Rjostii
CasCterm_Rjostii
FadE34Nterm_Mtb
FadE34Cterm_Mtb

```

130 140 150 160 170 180

```

MCAD_Pig
SCAD_Melsdenii
IBH_human
LCAD_rat
IVH_Human
FadE26_Mtb
FadE27_Mtb
FadE28_Mtb
FadE29_Mtb
CasCterm_Rjostii
CasCterm_Rjostii
FadE34Nterm_Mtb
FadE34Cterm_Mtb

```

190 200 210 220 230 240

|                  | 250       | 260                             | 270 | 280                                       | 290 | 300                         |
|------------------|-----------|---------------------------------|-----|-------------------------------------------|-----|-----------------------------|
| MCAD_Pig         | IAMGTFDKT | RPVVAAGAVGLAQRALDEATKYALE       | R   | KTFGKLLAEHQGISFLLADMAMKVE                 |     |                             |
| SCAD_Melsdenii   | IAMMTLDGG | RIGVAAQALGIAEAAALADAVEYSKQ      | R   | VQFGKPLCKFQSFKFLADMAMKQIE                 |     |                             |
| IBH_human        | IAVRGLNGG | RINIASCSLGAHAASVILTRDHLNVR      | K   | QFGEPLASNQYLQFTLADMATRLV                  |     |                             |
| LCAD_rat         | YLMQELPQ  | ERLLIADLAISACEFMFEETRNYVRQ      | R   | KAFGKTVAHQTVQHKLAELKTNIC                  |     |                             |
| IVH_Human        | VLMSGLDL  | ERLVLAGGPLGLMQAVLDHTIPYLHV      | R   | EAFGQKIGHFQLMQGKMDMYTRLM                  |     |                             |
| Fade26_Mtb       | LVTNQLNH  | ERVALVSPAP                      |     | IFGCLREVREWAQNTKDAGGTRLIDSEWVQLNLARVHAKAE |     |                             |
| Fade27_Mtb       | LG        | TLSTLSRTAFQLGVLERGLQMTAEYART    | R   | EQFDRPIGSPQAVGQRLADGYIDVK                 |     |                             |
| Fade28_Mtb       |           | QLALAVMGAYADGLVAGALRLTADYVAN    | R   | KQFGKPLSTFQTVAQAALAEVYIASR                |     |                             |
| Fade29_Mtb       | LITTQLNN  | ERVMLGPAGR                      |     | FASIYDRVHAWAS                             |     | VPGGNGVTPIDHDDVKRALGEIRAIWR |
| CasCterm_Rjostii |           | RVRDLAATLFAAEASGVADWAVTTADYANV  | R   | HQFGRPIGQFGVQKRVARMLCLAE                  |     |                             |
| CasCterm_Rjostii | LARTTLAN  | ERVSLSHDSS                      |     | LGSGGEALLTLAGELPGIDEEQLT                  |     | VLGKVLCDAQ                  |
| Fade34Nterm_Mtb  |           | RVEDLAATVLAEEAAGVARWTLDTAVAYAKV | R   | EQFGKPIGSPQAVKHLCAQMLCRAE                 |     |                             |
| Fade34Cterm_Mtb  | LARTTLAN  | ERVAMATGTA                      |     | LGNPMEELLKVLGDME                          |     | LDVAQQDRLGRILLIAQ           |

|                  | 310               | 320                                          | 330 | 340                               | 350                         |
|------------------|-------------------|----------------------------------------------|-----|-----------------------------------|-----------------------------|
| MCAD_Pig         | LARLSYQRAAWE      | IDS                                          | GRR | NTYYASIAKAYAADIANQLATDAVQVFG      |                             |
| SCAD_Melsdenii   | AARNLVYKAAACKKQE  |                                              | GKP | FTVDAAIAKRVASDVAMRVTTAVQIFG       |                             |
| IBH_human        | AARLMVRNAAVALQE   |                                              |     | ERKDAVALCSMAKLFATDECFAICNQALQMHG  |                             |
| LCAD_rat         | VTRAFVD           | SCLQLHE                                      |     | TKRLDSASASMAKYWASELQNTVAQCQVQLHG  |                             |
| IVH_Human        | ACROYVYNVAKACDE   |                                              |     | GHC                               | TAKDCAGVILYSACATQVALDGIQCFG |
| Fade26_Mtb       | VLKLINWELASSQSGP  |                                              |     | KDAGPSPADASA                      | AKVFGTELATEAYRLLMEVLG       |
| Fade27_Mtb       | GLRLTLTQA         | AARVAEDSLASR                                 |     | ECPQPADIDVATAGFWAAEAGHRVAHTIVHVHG |                             |
| Fade28_Mtb       | TIDLVAKSVIWR      | LAED                                         |     | LDAGDDLGVVLYGWWVTSQAPPAMQICHHLHG  |                             |
| Fade29_Mtb       | INELLNWQVASAG     |                                              |     | EDINMADAATAKVFGERVQRAGRLAAEIVG    |                             |
| CasCterm_Rjostii | QARVCAWDAARAMNP   | GSSARAATAVPRCSAPEASLAAAVAGATAPDAFAVTKDCIQVVG |     |                                   |                             |
| CasCterm_Rjostii | SGGLMGLR          | TTLRTIA                                      |     | GGQPGAESSVAKLLGVEHIQVWVEVAMDWAG   |                             |
| Fade34Nterm_Mtb  | QADVAAAADAARAAAAD |                                              |     | SDGTQLSIAAAVAASIGIDAAKANAKDCIQVVG |                             |
| Fade34Cterm_Mtb  | AGALLDRRIAELAVG   |                                              |     | GQDPGAQSSVRKLI                    | GVRYRQALAEYLMVEVSD          |

|                  | 360                               | 370                   | 380     | 390            |                        |
|------------------|-----------------------------------|-----------------------|---------|----------------|------------------------|
| MCAD_Pig         | GNGFNTEYPVEKLMR                   | DAK                   | IYQIY   | GTAGIQR        | IIAREHIGRYKN           |
| SCAD_Melsdenii   | GYGYSEYYPVARHMR                   | DAK                   | ITQIY   | GTNEV          | QLMVTGGALLR            |
| IBH_human        | GYGYLKDYAVQQYVR                   | DSR                   | VHQIL   | GSNE           | VMRILISRLLQE           |
| LCAD_rat         | GWGYMWEYPIAKAYV                   | DAR                   | VQPIYGG | TNE            | IMKELIARQIVSDS         |
| IVH_Human        | GNGYINDFPMPGRFLR                  | DAK                   | LYEIGAG | TS             | EVRRLVIGRAFNA DFH      |
| Fade26_Mtb       | TAATLRQNSPGALLRGRVERMHRACLILTFGGG | TNE                   | VQRDI   | IGMVALGLPRANR  |                        |
| Fade27_Mtb       | GVGVDTDHPVHRYPFLAAKQTE            |                       | FALGGA  | TGQLRR         | IGRELAETPA             |
| Fade28_Mtb       | GMGMDVTPMHRYYSTIKDLT              |                       | RLLGGP  | SHRLELLGARCSLT |                        |
| Fade29_Mtb       | KYGNPAEPDTAELLR                   | WLDQAQTKRNLVITFGGGVNE | VMRE    | MIAASGLKVPVPR  |                        |
| CasCterm_Rjostii | GIGYTWEHDAHLYLR                   | RAQS                  | LRILLGS | TAS            | WRRRVARATLG            |
| CasCterm_Rjostii | PRALLGDQPRTSATQMFLNSQ             |                       | CMSIAGG | TN             | QNLNIGERLLGLPRDPEPGKGA |
| Fade34Nterm_Mtb  | GIGCTWEHDAHLYLR                   | RAHG                  | IGGF    | LGG            | SGRWLRRV               |
| Fade34Cterm_Mtb  | GGGLVENR                          | AVYDFL                | NTR     | CLTIAGG        | TEQILLTVAERLLGL        |

28 **Figure S2** Coomassie blue stained SDS-PAGE gels of purified wild-type and variants of CasC,  
29 FadE34 and FadE28-FadE29. A) CasC B) FadE34 C) FadE28-FadE29. Positions of molecular  
30 weight markers are shown beside each gel. The wild-type proteins in each gel (CasC, FadE34  
31 and FadE28-FadE29) are in lane 1, the arginine to alanine variants (CasCR239A, FadE34R236A,  
32 FadE28R227A) are in lane 2, and the glutamate to glutamine variants (CasCE598Q,  
33 FadE34E581Q, FadE29E241Q) are in lane 3.  
34

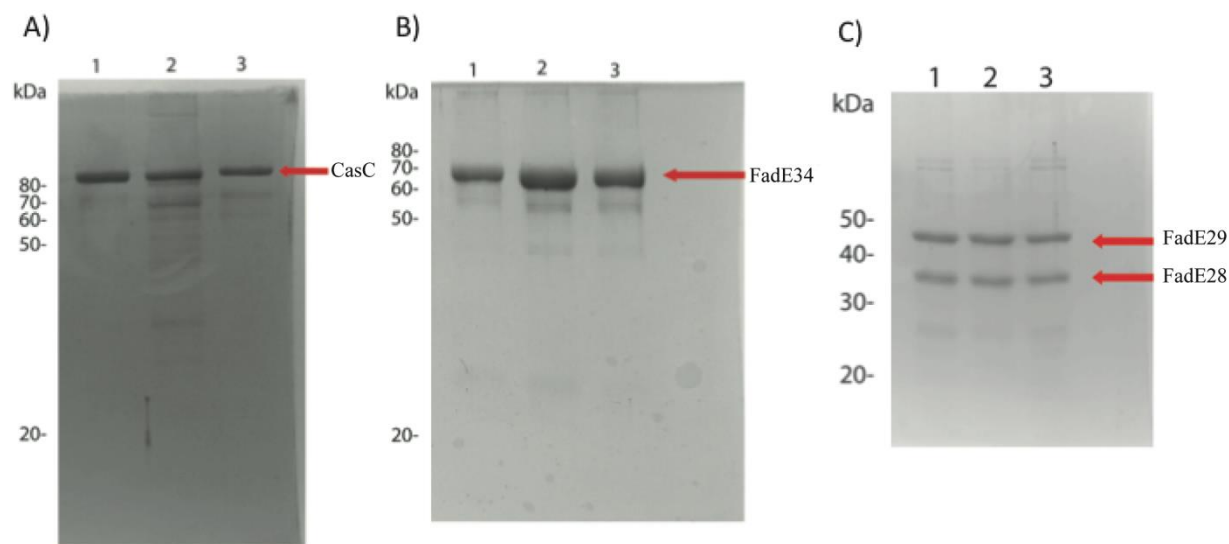

35  
36  
37  
38  
39  
40

41 **Figure S3** Multiple sequence alignment of CasC, FadE34 and other 2 domain ACADs.  
42 Amino acid sequences of proteins are as follows: FadE34 from *M. tuberculosis* H37Rv  
43 (FadE34\_Mtb), CasC from *R. jostii* RHA1 (CasC\_Rjostii), and homologs of FadE34/CasC from  
44 *Mycobacterium smegmatis* JS623 (Mycsm00272\_MsmegJS623, GI:505117216), *Mycobacterium*  
45 *rhodesiae* NBB3 (MycrhN2240\_MrhodNBB3, GI:503976649), *Rhodococcus erythropolis* PR4  
46 (RER51020\_ReryPR4, GI:527108386), *Rhodococcus equi* 103S (REQ43690\_Requi103S,  
47 GI:503182764), *Gordonia polyisoprenivorans* VH2 (GPOLc41540\_GpolyVH2, GI:504129432)  
48 and *Comamonas testosteroni* CNB-2 (CtCNB1299\_CtestCNB2, GI:264677435). Fully  
49 conserved residues are highlighted in red while the positions of the catalytic glutamic acid  
50 residues and the arginine residues that interact with the pyrophosphate FAD are indicated with  
51 blue asterisks.

52

53

54

55

56

57

58

59

60

61

62

63

64

65

66

67

68

69

**FadE34\_Mtb** VVATVTEQSAARELVRGWARTAAASGAAATAAVRDMVEYGFEEGNADAWRPVFAAGL**AGL**CLFGVAVF**EDC**  
**CasC\_Rjostii** MTMGLTTEERDLRDSVRGWA...TRVTPAVLREAVE...AKTEQRPLFWKSL**ADL**GLVGLHLF**EDV**  
**Mycsm00272\_Msmeg** MPIAITSPEHNDLADSVQSLV...ARVAPSEVLHEALE...TPVSNPPPYWKAA**EQ**QLQGVHLS**ESV**  
**MycrhN2240\_MrhodNBB3** MSATITDEQFAARELVRSWA...AASGAAA...AARDVE...QGQPDARAAAYDGL**AGL**GIFGVAIF**EEQ**  
**RER51020\_ReryPR4** MTIGLSEEDRDLRDSVRGWA...ARHATPTAIREAVE...AKVETRPQLWSGL**EQ**GLLGLHVA**EEF**  
**REQ43690\_Requi** .....MIREAVE...AKTETRPGYWGS**LEL**GMLGLHLF**EEF**  
**GPOLc41540\_GpolyVH2** MTLATSSEQLAVCEAIAAWS...ARVGTTDIARAQID...KPGEDWLGLFHQL**AEF**CLFAAVLP**ESK**  
**CtCNB1299\_CtestCNB2** MNFDSDDDQNALRNEIRKFL...TRESPLTQARALLE...GEGHHAQDVWSGM**AGL**GVSSLMFL**EDC**

**FadE34\_Mtb** GAGGSIEDLCAMVDEAARALVPGPVAT.....TAVATLVVSDPK...LRALASGER..FAGVAIDG  
**CasC\_Rjostii** GAGCGLVELAVVTEELGRVLLPGPFLL.....TVLLGAVLHESGR.TGELSGVADGST..LGAVALQP  
**Mycsm00272\_Msmeg** QQGFGLLELAIVLAEFGYVAVPGFVP.....SAIASALISANDRDAKLNDLNASGEV..IAAYAIDS  
**MycrhN2240\_MrhodNBB3** GADGTVEDLCAMVDEAGAALVAGPVAT.....TALATLLIDRAD...VLEPLIAGER..VAGVSLTS  
**RER51020\_ReryPR4** GAGYGLVELAIVVEELGRSMVPGTFLL.....TVVVSVAVLSADGV.TAPLAGLVADGST..LGAVALQP  
**REQ43690\_Requi** GAGYGLVELAIVTEELGRAMVPGPFLL.....TAVSVTLREAGR.TAELEGLDAGSL..FGAVALQP  
**GPOLc41540\_GpolyVH2** GLGAGFTDLAAMLEQCGRDLVPGPIGE.....TAATATALTMTDD..PRAEELAAV..VAGEAPGV  
**CtCNB1299\_CtestCNB2** GIGLGAMEMCVVAEVRQLSPVPLASTMYLAVQAVLLSTLQEQSAQRRLQWLLPVSVGSIGLCAAAFTDQG

**FadE34\_Mtb** G...VQVDPKSTASGTVGRVL.GGAPGGVVL**LP**ADGN.....WLLVDTACDEVVVEPLRAT**D**FSLP  
**CasC\_Rjostii** GSLRLVRDGGVVTLDGESYVL.GGQVGDVFL**LA**ATDGDG.....TVYVVVARDRLDVTDLP**SH**DVVR  
**Mycsm00272\_Msmeg** G.LTATRHDGLVIRGEVRAVP.AAAQAALV**LV**PAIDSG.....EEMVLDADQLEIEPAK**S**DPLRP  
**MycrhN2240\_MrhodNBB3** D...VTFD..GGRASGTAEVVL.GADPAGV**LV**LPAGDK.....VVLIDAGAGVTIEPLKAT**D**FSRP  
**RER51020\_ReryPR4** GSLKIARDGDTATLSGTSSQIL.GGHVGDVFL**LA**TDG.....FVLLGRDRLEVTLDL**AS**YDVVR  
**REQ43690\_Requi** GGLKLVRDGGKTTLSGTSSHIL.GGQVGDVFL**LA**ASDDDDAAEGGLSFVVVARDRLDV**T**ELPS**H**DVVR  
**GPOLc41540\_GpolyVH2** V...PVFDG**PL**PSIGDRV**EL**VVPGY**DA**AV**LV**LP**TV**DG.....WRILAPAYGMER**RT**V**ET**VP**D**GATP  
**CtCNB1299\_CtestCNB2** EPPSGLPLFDGKTLKGECP**LV**ADGMAAQ**GV**LA**RN**ETGAD.....VLVAF**RC**DYGS**MR**TK**KL**L**T**D**PS**KP

**FadE34\_Mtb** LARMVLT...SAPVT..VLEVSG.ERVEDLAATVLAEEAA**G**VARWTLDTAVA**YAKVRE**Q**FG**K**PT**CS**F**OAV  
**CasC\_Rjostii** SATAAANRLAIAEVD..VLQ**IDS**.QRVRDLAATLFAAAEAS**G**VADWAVTAA**YANVR**HQ**FG**RP**IC**Q**F**OAV  
**Mycsm00272\_Msmeg** LAHVRANAVEGEDR..VLSHL**SRT**LARALMSTLLSAEA**I**GVARWATDTASA**YAKI**EQ**FG**RP**IC**Q**F**OAV  
**MycrhN2240\_MrhodNBB3** LGRVVL...SAPAE..ALS**AST**.QRPTDVAATVLAEEAA**G**LARWALQ**TATE**YAK**VR**EQ**FG**K**PT**CS**F**OAV  
**RER51020\_ReryPR4** NSEVTVDGLIADSE..ILT**IDT**.QRVLDIAATLFAAAEAS**G**LADWAVTTSAD**YAKV**Q**FG**RP**IC**Q**F**OAV  
**REQ43690\_Requi** NAEVTADGLELSDGD..VLE**LDS**.QRILDIAATLFAAAEAS**G**LADWATTTAA**YARV**Q**FG**RP**IC**Q**F**OAV  
**GPOLc41540\_GpolyVH2** VTRVTIEGL.EPDAP..IVC**ADS**.PLVDGVLALARN**A**FAS**G**VCRWALDTAV**G**YAK**VR**Q**FG**RP**IC**Q**F**OAV  
**CtCNB1299\_CtestCNB2** YAWLRF**FD**GTA**EQ**LDGAS**AA**QV**LA**RVRNRAAV**ML**A**FE**Q**L**GAADA**AL**EM**ACS**Y**ARE**R**K**A**FG**RP**IC**Q**F**OAV

**FadE34\_Mtb** **KH**L**CA**Q**ML**CR**AE**Q**AD**V**AA**DA**AR**AAA.....DSDGT**QL**SIAAAV**AS**IG**IDA**AK**AN**AK**DC**IQV  
**CasC\_Rjostii** **KH**RV**AR**ML**CL**AE**Q**AR**VC**AW**DA**AR**AN**MGSS**SARA**ATA**V**PRCS**AP**EA**SL**AAV**AG**AT**AD**PA**FA**V**T**K**DC**IQV  
**Mycsm00272\_Msmeg** **KH**K**CA**EM**I**AD**TER**ATA**AV**W**DA**AR**AI**DE**YS**.....ETGS**QD**S**AF**E**FA**AAV**AT**LA**PA**AA**LH**CT**QD**CIQV  
**MycrhN2240\_MrhodNBB3** **KH**MC**AE**ML**LR**SE**Q**AS**V**AA**DA**AR**AV**S.....EDDER**QL**SIAV**AA**AG**IA**NA**AK**AN**AK**DCIQV  
**RER51020\_ReryPR4** **KH**K**AR**ML**AL**AE**Q**AR**VC**AW**DA**AR**AL**TP.....ANGV**GA**EE**AS**LA**AA**V**AG**AT**AL**E**AG**FS**V**TR**DC**IQV  
**REQ43690\_Requi** **KH**K**AR**MF**SL**TE**Q**AR**VC**AW**DA**AR**AL**G.....EDVD**GT**E**AS**LA**AA**V**AG**AV**AL**E**SA**F**Q**V**T**K**DC**IQV  
**GPOLc41540\_GpolyVH2** **KH**IC**AD**ML**CR**TE**Q**VE**AA**W**LD**AN**AL**DS.....AA**AD**DE**QL**SL**S**V**D**V**AD**IL**V**AD**LP**GA**V**TF**K**DC**V**QV  
**CtCNB1299\_CtestCNB2** **KH**KL**AN**LY**TN**Q**L**AR**A**HC**Y**Y**GA**W**AL**T**AD**.....MAL**AD**GA**PE**LP**GA**AAA**AR**V**S**ST**Q**AL**SD**AA**Q**EN**L**HT

**FadE34\_Mtb** LGGIGCT**WE**H**DA**HLYL**RR**AGIGGFLGGSGRWLRRV**T**ALT**QA**.....G**V**RRRL**GV**DL**LA**.  
**CasC\_Rjostii** LGGIGY**T**WE**H**DA**H**LYL**RR**A**Q**SLRILLGGSTAS**W**RRR**V**ARAT**LG**.....G**A**RRV**LG**IDL**PS**  
**Mycsm00272\_Msmeg** HGGIG**CT**WE**H**DA**H**LYL**RR**A**IM**LN**CF**RGAD**Y**P**Q**V**D**V**AT**S.....T**GL**R**K**ID**LD**LD**L**  
**MycrhN2240\_MrhodNBB3** LGGIG**CT**WE**H**DA**H**LYL**RR**A**GI**E**H**FLGAG**Q**W**L**R**IA**T**L**T**Q**.....G**V**RR**LE**IDL**E**.  
**RER51020\_ReryPR4** LGGIGY**T**WE**H**DA**H**LYL**RR**A**Q**SLRILLGGSTAS**W**RRR**V**AEL**T**IA.....G**T**RRV**LS**IEL**PP**  
**REQ43690\_Requi** LGGIG**CT**WE**H**DA**H**LYL**RR**A**Q**SLRILLGGSTAS**W**KRR**V**AN**L**T**ID**.....G**A**RRV**LS**IDL**PP**  
**GPOLc41540\_GpolyVH2** LGGIG**CT**WE**H**DA**H**LYL**RR**S**AR**AR**AL**DAG**V**PAR**IS**L**S**Q**R**GLD.....G**GR**FE**IDL**S.  
**CtCNB1299\_CtestCNB2** HGGIG**CT**WE**L**D**CH**LFY**RR**AR**Q**Q**AV**ELG**SI**H**AW**RE**Q**V**AV**EL**Q**K**RL**L**PA**K**ET**IG**Q**SS**AA**DR**Q**S**MD**F**ED**TP

**FadE34\_Mtb** EVAGL**R**PE**IA**AA**VA**E**VA**AL**PE**EK**R**.....Q**VAL**AD**TC**LL**AP**H**W**P**AP**Y**C**.RGAS**PAE**  
**CasC\_Rjostii** DAED**I**RA**D**V**VA**EL**AP**AA**AM**GE**AE**R.....R**TYL**AE**K**GY**T**AP**H**L**P**T**PW**G.RGAG**A**VE  
**Mycsm00272\_Msmeg** DTE**K**L**RE**E**IR**AE**VA**AL**K**A**IP**RE**E**R.....T**VAL**AE**G**GW**V**P**H**L**P**K**P**W.GRAS**P**VE  
**MycrhN2240\_MrhodNBB3** SVE**H**L**RE**PE**IA**S**AV**AE**VA**A**Q**PA**E**K**R**.....Q**VAL**AD**TC**LL**AP**H**W**P**RP**H.GEAG**S**PAE  
**RER51020\_ReryPR4** EAE**A**T**RA**D**V**RA**EL**GP**AL**E**GA**EQ.....K**TYL**AE**K**GY**T**AP**H**L**P**TA**P**W.KSAD**A**VS  
**REQ43690\_Requi** EAE**Q**I**RA**D**V**RA**EL**GP**AL**E**GA**EQ.....K**AYL**AE**K**GY**T**SP**H**L**P**AP**W**.KGAD**AV**T  
**GPOLc41540\_GpolyVH2** AVES**Q**RA**EV**RA**MA**E**K**V**RA**AP**E**SE**Q**.....R**RL**L**AE**S**G**Y**L**AP**H**W**P**PP**H**C.LGAD**PA**L  
**CtCNB1299\_CtestCNB2** EE**AA**F**RA**EC**R**AW**L**Q**AN**A**E**PK**AS**AD**MY**FG**R**DM**T**AE**Q**R**ME**AA**R**L**W**Q**G**K**AA**AG**FG**A**IT**W**PK**ML**G**GR**GG**TP**M**Q

**FadE34\_Mtb** QLLID**Q**EL**AA**AK**VER**PD**L**VIG**W**.W**AV**PT**IL**EH**GT**PE**Q**IER**F**VP**AT**MR**GE**FL**WC**Q**L**F**SE**FP**GA**GS**DL**AS**LR**T  
**CasC\_Rjostii** QLVIA**E**EL**RA**AA**L**K**PH**DM**I**GN.W**V**VP**TL**IA**H**GS**EE**QL**Q**R**F**VP**PS**LR**GD**LV**WC**Q**L**F**SE**FP**GA**GS**DL**AS**LR**T  
**Mycsm00272\_Msmeg** QIIIA**Q**E**FT**T**G**K**V**RR**PN**MG**IA**.W**L**IP**SV**V**AF**GT**EE**Q**K**Q**R**FL**P**PT**LR**G**EM**I**WC**Q**L**F**SE**FP**GA**GS**DL**AS**LR**T  
**MycrhN2240\_MrhodNBB3** QLLID**Q**EL**AK**T**D**V**VR**PD**L**VIG**W**.W**AV**PT**IL**EH**GS**PE**Q**IE**K**F**V**PA**T**LR**GE**FL**WC**Q**L**F**SE**FP**GA**GS**DL**AS**LR**T  
**RER51020\_ReryPR4** QLVIA**E**EL**RA**AK**IK**PH**DM**I**GN**.W**V**IP**TL**IA**H**GN**EE**QL**A**K**F**VP**PS**LR**GD**LV**WC**Q**L**F**SE**FP**GA**GS**DL**AS**LR**T  
**REQ43690\_Requi** QLVIA**E**EL**RA**AA**L**V**PH**DM**I**GN.W**V**IP**TL**IA**H**GN**AE**Q**IE**R**F**VP**Q**SLR**GD**LV**WC**Q**L**F**SE**FP**GA**GS**DL**AS**LR**T  
**GPOLc41540\_GpolyVH2** QLLID**A**E**FD**RA**GV**VR**PD**L**V**IG**W**.W**AV**PT**IL**EH**GT**DA**Q**R**DR**F**V**AP**T**LA**GD**LI**WC**Q**L**F**SE**FP**GA**GS**DL**AS**LR**T  
**CtCNB1299\_CtestCNB2** ELI**WR**Q**E**GG**K**V**K**VP**T**GM**F**N**V**SL**GM**VL**PT**SM**A**H**AS**AE**VL**L**H**V**AP**AL**GG**KN**L**WC**Q**L**F**SE**FP**GA**GS**DL**GM**VR**T**

**FadE34\_Mtb** K**AV**RA**D**G.....G**W**LL**T**G**Q**K**V**W**T**S**A**A**H**K**AR**W**CV**L**AR**T.D**P**D**A**P**K**H**K**G**IT**Y**F**L**V**D**M**T**T**P**G**I**E**I**R**P  
**CasC\_Rjostii** R**AT**K**V**D**G**.....G**W**V**L**T**G**Q**K**V**W**T**S**A**A**R**S**D**AD**W**G**I**C**L**AR**T.D**G**S**V**P**K**H**K**G**IT**Y**F**L**D**M**S**G**S**D**G**L**D**I**R**P  
**Mycsm00272\_Msmeg** K**AT**K**V**D**G**.....G**W**R**I**T**G**Q**K**I**W**T**G**A**Q**L**S**Q**W**M**L**L**AR**T.D**P**S**A**P**K**H**N**G**IT**Y**F**L**D**M**K**S**E**G**VE**V**K**P  
**MycrhN2240\_MrhodNBB3** K**AV**RA**E**G**V**S**AS**G**T**K**S**G**W**K**L**T**G**Q**K**V**W**T**S**A**A**H**K**A**AW**G**V**C**L**AR**T**.D**P**D**A**P**K**H**K**G**IT**Y**F**L**D**M**K**S**P**G**ID**I**R**P  
**RER51020\_ReryPR4** K**AT**K**V**D**G**.....G**W**K**L**Q**G**Q**V**W**T**S**M**A**R**DA**H**W**G**I**C**L**AR**T.D**A**D**A**P**K**H**K**G**IT**Y**F**L**D**I**K**N**S**.G**L**D**I**R**P**  
**REQ43690\_Requi** K**AT**K**V**D**G**.....G**W**K**L**N**G**Q**K**V**W**T**S**M**A**RE**AD**W**G**I**C**L**AR**T.D**A**D**A**P**K**H**K**G**IT**Y**F**L**D**I**K**N**S**.G**L**D**I**R**P**  
**GPOLc41540\_GpolyVH2** R**AT**R**T**D**G**.....G**W**M**L**T**G**Q**K**I**W**T**S**A**A**H**N**A**Q**W**G**I**C**L**AR**NG**D**G**T**P**K**H**K**G**IT**Y**F**L**V**D**M**AS**P**.G**ID**I**R**P  
**CtCNB1299\_CtestCNB2** R**A**E**R**AT**D**.....G**R**E**W**L**V**N**G**Q**K**V**W**T**S**L**A**Q**F**A**Q**E**G**L**V**L**T**R**T**.N**P**Q**AS**K**FE**G**L**T**T**F**L**D**M**K**S**P.G**IT**V**R**P



```

540      550      560      570      580*      590      600
FadE34_Mtb      LREITGDSL FNEVFLDN VFVPEDEMVGAVNDGWRLAR TLANERVAMAT .GTALGNPMEELLKVLGDME .
CasC_Rjostii    LREITGEAL FNEVFLDD VFVPEDELLVGEFGDGWKLAR TLANERVSLSH .DSSLGSGGEALLTLAGELPG
Mycsm00272_Msmeg LREITGNAM FNEVFI DD VFVPEDDLVLGEVNRGWEVSR TLANERVSI GNSEAPFLANLNGFVEFIRDGH .
MycrhN2240_MrhodNBB3 LREITGDNLFNEVFFDD VFVPEDEMVGQVNDGWRLAR TLANERVAMAH .GTALGNPMEELLRTVAELE .
RER51020_ReryPR4 LREITGEAL FNEVFLDD VFVPEDECLVGEFGDGWKLAR TLANERVSLSN .DSSLGSGGEALLSLVDGLPG
REQ43690_Requi  LREITGEAL FNEVFLDD VFVPEDECLVAEFGDGWKLAR TLANERVSLSH .DSSLGSGGEALLDLAASIPG
GPOLc41540_GpolyVH2 LRELTGRAN FNEVFLDE VFVPEDCVVGVEVGGWWRLAR TLANERVAMG .GSLGKEMESLLHQISGMSR
CtCNB1299_CtestCNB2 IRQAGGESE FNEVFFED VFVPEDSQMVGKLGSGWKVTL TGLMAERLAIGGVMPAELWRTTAGLLADHRFDG

610      620      630      640      650      660      670
FadE34_Mtb      . . . . LDVAQQDR LGR L I L L A Q A G A L L D R R I A E L A V G G Q D P G A Q S S V R K L I G V R Y R Q A L A E Y L M E V S D G G G
CasC_Rjostii    G . . . I D E E Q L T V L G K V L C D A Q S G G L M G L R T T L R T I A G G Q P G A E S S V A K L L G V E H I Q V W E V A M D W A G P R A
Mycsm00272_Msmeg . . . . F D Q I D Q N R A G R L I A E G H A A K L L N M R S T L L T L A G D P M P A A A I S K L L S M R T G Q S Y A E F A V S S F G T D G
MycrhN2240_MrhodNBB3 . . . . L D S T G Q Q L G T L I L A A Q V G S L L D Q K I A E L L V G Q D P G P Q A S A R K L I G V R Y R Q A L S E L R M E L S P G G G
RER51020_ReryPR4 G . . . I D D E Q L T V L G K V L C D A Q S G G L L G L R T T L R S L T G A Q P G A E S S V A K L I G V E H I Q V W D V A M E W A G P S S
REQ43690_Requi  G . . . I D D E Q M T V L G K V L C D A Q S G G L M G L R T T L R S L T G A Q P G A E S S I A K L L G V E H I Q V W E V A M E W A G P S S
GPOLc41540_GpolyVH2 P . . . L E R A E Q A R L G R L V A D A H I G R V L D A R A V T R R L A G H D P G A L S N V R K L I G V A H R Q S V P E A A L D F L G L D A
CtCNB1299_CtestCNB2 R P A L Q D G R L R E R W A D L Y L K E Q A L W L L Q C R A L T A L S K G R Q P G P E M S G A K N V A A A A L Q S F S Y F A I D L L G E R G

680      690      700      710
FadE34_Mtb      LVEN . . . . . R A V Y D F L N T R C L T I A G G T E Q I L L T V A A E R L L G L P R . . . . .
CasC_Rjostii    L L G D Q P . . . R T S A T Q M F L N S Q C M S I A G G T T N V Q L N I I G E R L L G L P R D P E P G K G A . . . . .
Mycsm00272_Msmeg A I G D P D Q . . L Q G Q L A Q M L L A S R A T T I Y G G T S E V Q L N I I A E R L L G L P R D P . . . . .
MycrhN2240_MrhodNBB3 V V D N . . . . . K T V F D F L N T R C L T I A G G T E Q I L L T M A G E R L L G L P R . . . . .
RER51020_ReryPR4 L L G E Q H . . . R M S A T Q M F L N S Q C M S I A G G T T N V Q L N I I G E R I L G L P R D P E P G K . . . . .
REQ43690_Requi  L L G E Q H . . . R R S A T Q M F L N S Q C M S I A G G T T N V Q L N I I G E R I L G L P R D P D P G K . . . . .
GPOLc41540_GpolyVH2 V I A G . . . . . G A S D L A L Q N R C L S I A G G T T Q I L K T A A A E R I L G L P R A . . . . .
CtCNB1299_CtestCNB2 V L A A S E L G E R F A M V E R L W F G S A G M R I A G G T D E V V L N S I G E R V L G L A A E P R A D K D L P F C E L L A

```
